# Supplementary material for: Effects of Ru doping on the structural stability and electrochemical properties of Li2MoO3 cathode materials for Li-ion batteries
Source: Royal Society of Chemistry journal article supplement (doi:10.1039/d2dt00826b), 2022-01-01
Supplement: d2dt00826b1.pdf [file d2dt00826b1.pdf]

# Effects of Ru Doping on the Structural Stability and Electrochemical Properties of $\text{Li}_2\text{MoO}_3$ Cathode Materials for Li-ion Batteries

Zhi-Xin He <sup>a</sup>, Hai-tao Yu <sup>a</sup>, Fei He <sup>b</sup>, Ying Xie <sup>a,\*</sup>, Lang Yuan <sup>a,\*</sup>, Ting-feng Yi <sup>c,\*</sup>

<sup>a</sup> Key Laboratory of Functional Inorganic Material Chemistry, Ministry of Education, School of Chemistry and Materials Science, Heilongjiang University, Harbin, 150080, PR China

<sup>b</sup> Key Laboratory of Superlight Materials and Surface Technology, Ministry of Education, College of Materials Science and Chemical Engineering, Harbin Engineering University, Harbin 150001, People's Republic of China

<sup>c</sup> School of Materials Science and Engineering, Northeastern University, Shenyang, 110819, PR China

\*Corresponding author: Ying Xie

E-mail: xieying@hlju.edu.cn (Dr. Ying Xie).

\*Corresponding author: Lang Yuan

E-mail: yuanlang@hlju.edu.cn

\*Corresponding author: Ting-feng Yi

E-mail: tfyihit@163.com

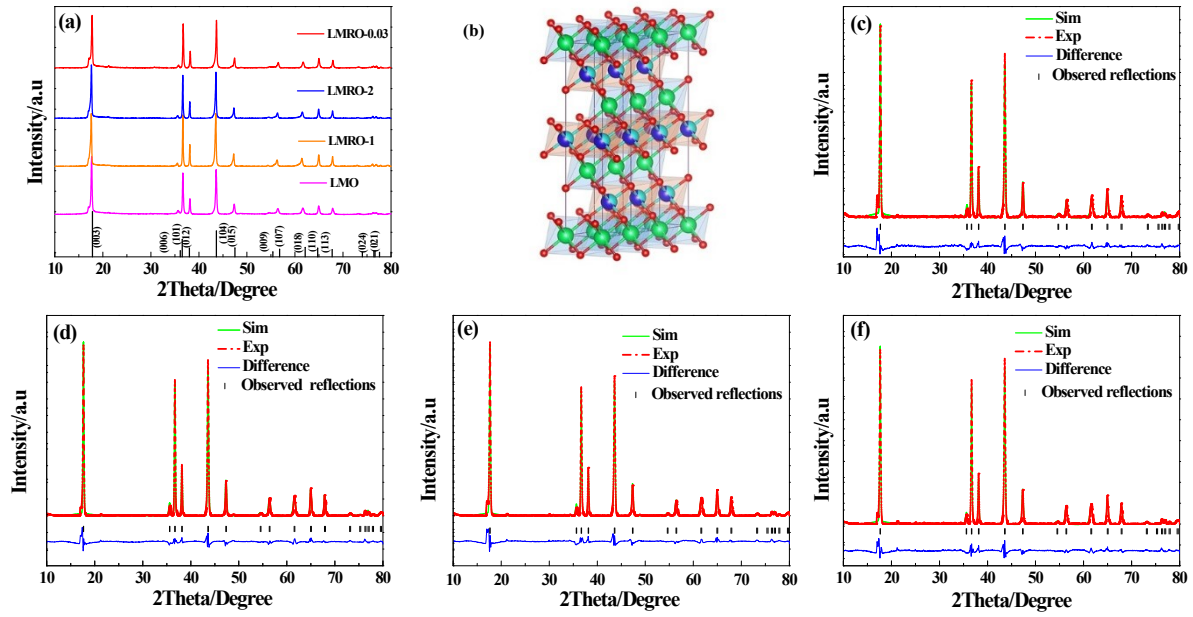

Figure S1 (a) XRD spectra of different samples (b)  $\text{Li}_2\text{MoO}_3$  structure model (c) LMO, (d) LMRO-1, (e) LMRO-2, (f) LMRO-3 refined XRD spectra.

Table S1 Lattice constants calculated from Rietveld refinement for different samples.

|        | a     | c      | c/a   |
|--------|-------|--------|-------|
| LMO    | 2.875 | 15.087 | 5.247 |
| LMRO-1 | 2.870 | 15.110 | 5.265 |
| LMRO-2 | 2.866 | 15.129 | 5.278 |
| LMRO-3 | 2.868 | 15.134 | 5.276 |

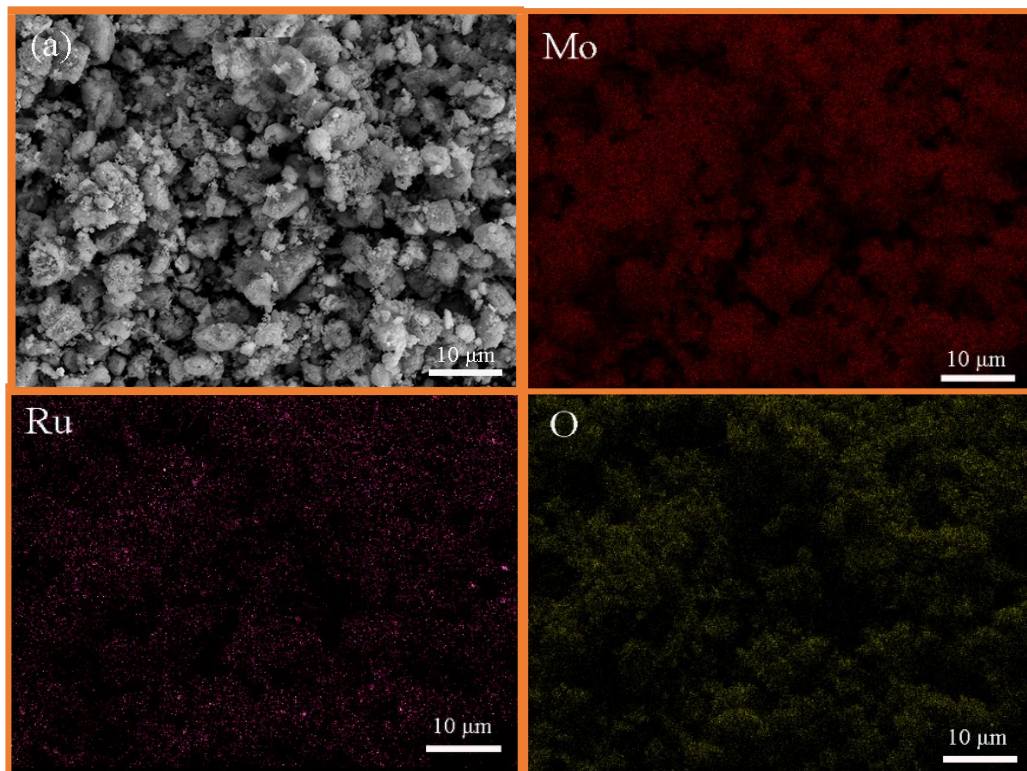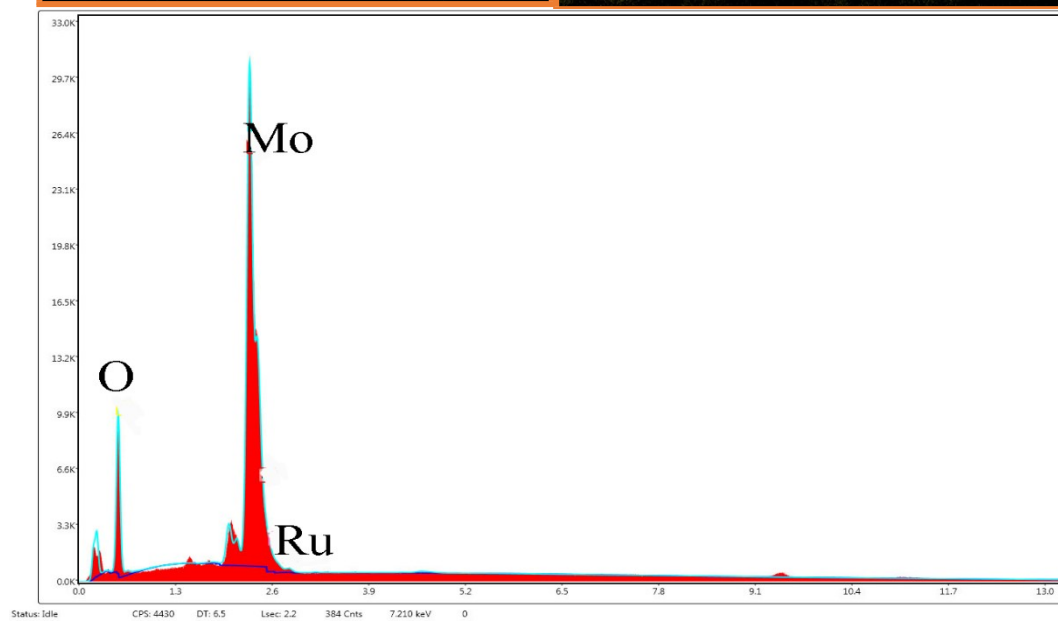

Figure S2 EDS analysis of LMRO-2 samples

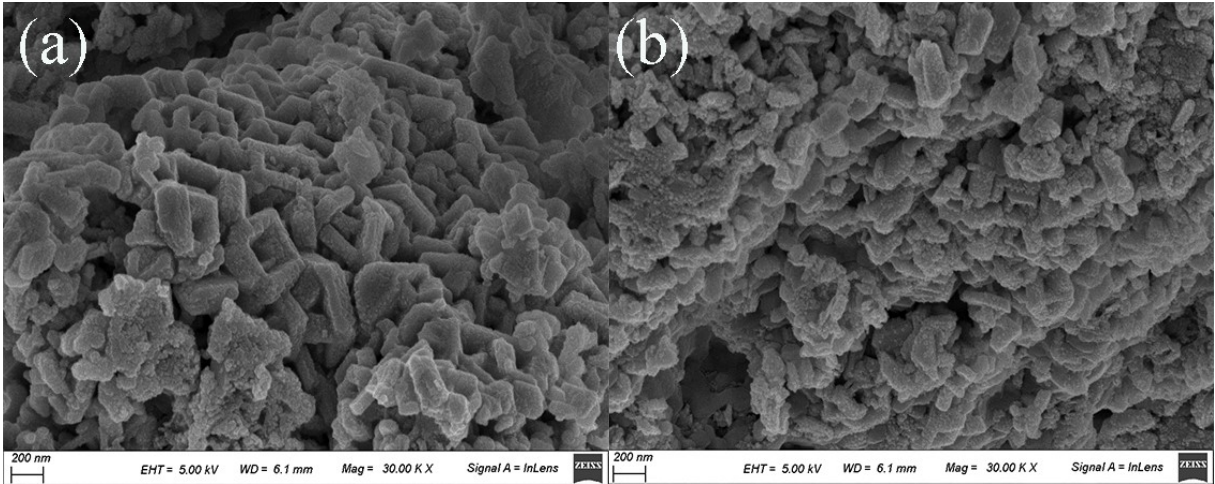

Figure S3 SEM image of (a) LMRO-1, (b) LMRO-3 sample

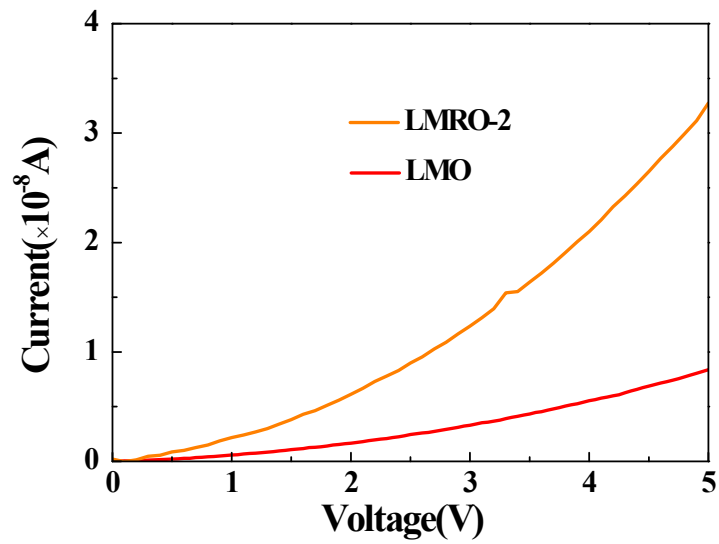

Figure S4 Current-voltage (I-V) curves for LMO and LMRO-2 samples measured at room temperature in air under the same condition.

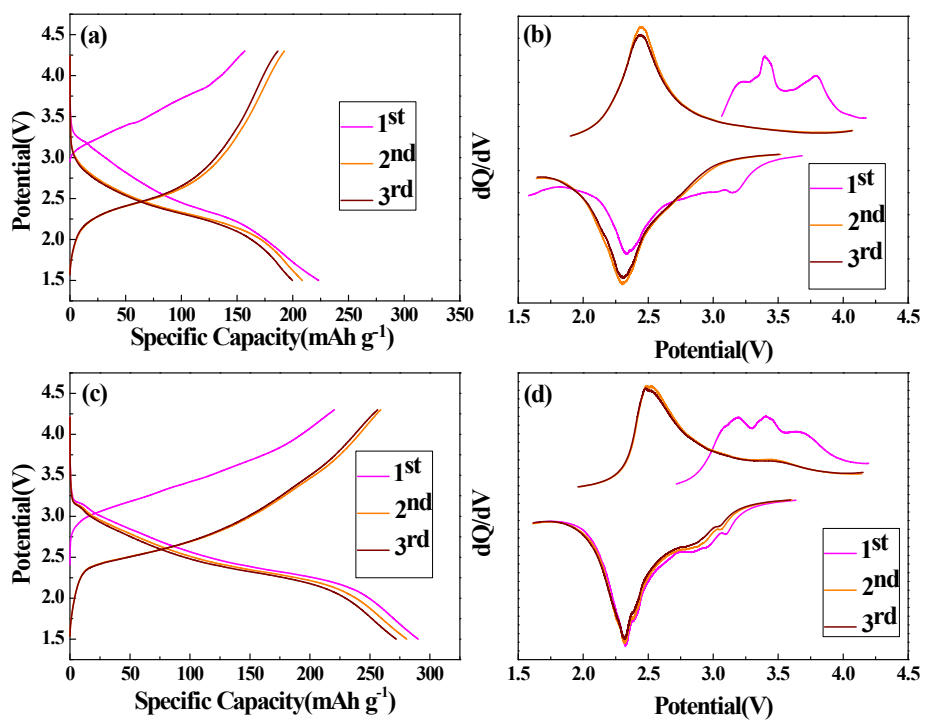

Fi

Figure S5 (a) and (c) Voltage curves for the initial 3 cycles between 1.5 and 4.3 V for LMO and LMRO-2 samples and (b) and (d) their differential capacity curves.
